# Supplementary material for: BaLiTe2O5X (X = Cl, Br): mixed alkali/alkaline-earth metal tellurite halides with [Te2O5]∞ chains
Source: Royal Society of Chemistry journal article supplement (doi:10.1039/d0dt00141d), 2020-01-01
Supplement: d0dt00141d1.pdf [file d0dt00141d1.pdf]

Electronic Supporting information

**BaLiTe<sub>2</sub>O<sub>5</sub>X (X = Cl, Br): Mixed alkali/alkaline-earth metal tellurite halides with [Te<sub>2</sub>O<sub>5</sub>]<sub>∞</sub> chains**

*Ting Wang,<sup>a</sup> Yi-Gang Chen,<sup>\*a</sup> Yao Guo,<sup>b</sup> Fang Wang,<sup>b</sup> Qi Song,<sup>a</sup> Ying-Jie Jia,<sup>a</sup> and Xian-Ming Zhang<sup>\*a</sup>*

<sup>a</sup>Key Laboratory of Magnetic Molecules and Magnetic Information Material of Ministry of Education, School of Chemistry and Material Science, Shanxi Normal University, Linfen 041004, China

<sup>b</sup>School of Chemical and Environmental Engineering, Anyang Institute of Technology, Anyang 455000, China

**Table S1.** Selected bond distances (Å) and important Angles (deg) for BaLiTe<sub>2</sub>O<sub>5</sub>Cl and BaLiTe<sub>2</sub>O<sub>5</sub>Br.

**Table S2.** Energy-Dispersive Spectrometry (EDS) data for BaLiTe<sub>2</sub>O<sub>5</sub>Cl and BaLiTe<sub>2</sub>O<sub>5</sub>Br.

**Fig. S1.** The images for BaLiTe<sub>2</sub>O<sub>5</sub>Cl and BaLiTe<sub>2</sub>O<sub>5</sub>Br.

**Fig. S2.** Energy-Dispersive Spectrometry (EDS) plot of BaLiTe<sub>2</sub>O<sub>5</sub>Cl and BaLiTe<sub>2</sub>O<sub>5</sub>Br.

**Fig. S3.** Experimental and simulated PXRD patterns of BaLiTe<sub>2</sub>O<sub>5</sub>Cl and BaLiTe<sub>2</sub>O<sub>5</sub>Br.

**Fig. S4.** Structure of Li<sub>2</sub>TeO<sub>3</sub>.

**Fig. S5.** Structure of Li<sub>3</sub>(TeO<sub>3</sub>)(OH).

**Fig. S6.** Structure of Li<sub>2</sub>Te<sub>2</sub>O<sub>5</sub>.

**Fig. S7.** Structure of Li<sub>7</sub>(TeO<sub>3</sub>)<sub>3</sub>F.

**Fig. S8.** TGA and DSC curves of BaLiTe<sub>2</sub>O<sub>5</sub>Cl and BaLiTe<sub>2</sub>O<sub>5</sub>Br.

**Fig. S9.** IR spectra of BaLiTe<sub>2</sub>O<sub>5</sub>Cl and BaLiTe<sub>2</sub>O<sub>5</sub>Br.

**Table S1.** Selected bond distances (Å) and important Angles (deg) for BaLiTe<sub>2</sub>O<sub>5</sub>Cl and BaLiTe<sub>2</sub>O<sub>5</sub>Br.

**BaLiTe<sub>2</sub>O<sub>5</sub>Cl**

|                   |           |                  |            |
|-------------------|-----------|------------------|------------|
| Te(1)–O(1)        | 1.891(2)  | Ba(1)–O(2)       | 2.797(2)   |
| Te(1)–O(2)        | 1.879(2)  | Ba(1)–O(3)       | 3.048(2)   |
| Te(1)–O(3)        | 1.833(2)  | Ba(1)–O(4)       | 2.709(2)   |
| Te(2)–O(5)        | 1.850(2)  | Ba(1)–O(5)       | 2.707(2)   |
| Te(2)–O(1c)       | 2.124(2)  | Ba(1)–O(1a)      | 2.816(2)   |
| Te(2)–O(1e)       | 2.124(2)  | Ba(1)–O(1c)      | 3.219(2)   |
| Te(2)–O(2b)       | 2.136(2)  | Ba(1)–O(1d)      | 2.816(2)   |
| Te(2)–O(4a)       | 1.856(2)  | Ba(1)–O(1e)      | 3.219(2)   |
| Te(2)–O(4d)       | 1.856(2)  | Ba(1)–O(3a)      | 2.962(2)   |
| Li(1)–O(3)        | 1.853(6)  | Ba(1)–O(3d)      | 2.962(2)   |
| Li(1)–O(4c)       | 2.007(6)  | Ba(1)–O(4c)      | 2.973(2)   |
| Li(1)–O(4e)       | 2.007(6)  | Ba(1)–O(4e)      | 2.973(2)   |
| Li(1)–O(5c)       | 2.002(6)  | Ba(1)–O(5b)      | 2.969(2)   |
| Li(1)–O(5e)       | 2.002(6)  | Ba(1)–Cl(1)      | 3.622(9)   |
| Li(1)–Cl(1f)      | 2.539(6)  |                  |            |
| O(2)–Te(1)–O(1)   | 94.19(10) | O(5)–Te(2)–O(2b) | 81.05(9)   |
| O(3)–Te(1)–O(2)   | 94.36(10) | O(5)–Te(2)–O(4d) | 108.67(10) |
| O(3)–Te(1)–O(1)   | 92.09(10) | O(3)–Li(1)–O(4c) | 107.6(3)   |
| O(1c)–Te(2)–O(2b) | 160.48(9) | O(3)–Li(1)–O(5c) | 103.9(3)   |

|                   |          |                    |          |
|-------------------|----------|--------------------|----------|
| O(4d)–Te(2)–O(1c) | 84.34(9) | O(5c)–Li(1)–O(4c)  | 107.5(3) |
| O(4d)–Te(2)–O(2b) | 88.23(9) | O(3)–Li(1)–Cl(1f)  | 125.4(3) |
| O(5)–Te(2)–O(1c)  | 84.27(9) | O(5c)–Li(1)–Cl(1f) | 104.7(2) |

Symmetry codes: a)  $-1/2+x, 1/2-y, -1/2+z$ ; b)  $2-x, -y, 2-z$ ; c)  $3/2-x, 1/2+y, 3/2-z$ ; d)  $1/2+x, 1/2-y, 1/2+z$ ; e)  $3/2-x, -1/2+y, 3/2-z$ ; f)  $2-x, 1-y, 1-z$ .

### **BaLiTe<sub>2</sub>O<sub>5</sub>Br**

|                 |           |                  |           |
|-----------------|-----------|------------------|-----------|
| Te(1)–O(1)      | 1.828(4)  | Li(1)–Br(1a)     | 2.728(10) |
| Te(1)–O(2)      | 1.889(4)  | Ba(1)–O(3)       | 3.208(4)  |
| Te(1)–O(3)      | 1.901(4)  | Ba(1)–O(4)       | 2.713(4)  |
| Te(2)–O(2)      | 1.862(4)  | Ba(1)–O(1a)      | 2.949(4)  |
| Te(2)–O(3)      | 2.124(4)  | Ba(1)–O(1b)      | 3.058(4)  |
| Te(2)–O(4)      | 1.847(4)  | Ba(1)–O(1e)      | 3.058(4)  |
| Te(2)–O(2c)     | 2.132(4)  | Ba(1)–O(2b)      | 2.819(4)  |
| Te(2)–O(2g)     | 2.132(4)  | Ba(1)–O(2e)      | 2.819(4)  |
| Li(1)–O(1)      | 1.848(10) | Ba(1)–O(3a)      | 2.832(4)  |
| Li(1)–O(2k)     | 2.010(10) | Ba(1)–O(4d)      | 3.003(4)  |
| Li(1)–O(4f)     | 1.982(10) | Ba(1)–O(5a)      | 2.963(4)  |
| Li(1)–O(4j)     | 1.982(10) | Ba(1)–O(5c)      | 2.711(4)  |
| Li(1)–O(5h)     | 2.010(10) | Ba(1)–O(5g)      | 2.711(4)  |
| Li(1)–Br(1i)    | 2.728(11) | Ba(1)–Br(1a)     | 3.7099(7) |
| O(1)–Te(1)–O(2) | 94.04(18) | O(5)–Te(2)–O(2g) | 87.78(16) |
| O(1)–Te(1)–O(3) | 92.11(17) | O(5)–Te(2)–O(3)  | 83.94(15) |

|                  |            |                   |          |
|------------------|------------|-------------------|----------|
| O(2)–Te(1)–O(3)  | 93.71(18)  | O(1)–Li(1)–O(4j)  | 105.1(5) |
| O(3)–Te(2)–O(2g) | 159.64(16) | O(1)–Li(1)–O(5k)  | 108.6(5) |
| O(4)–Te(2)–O(2g) | 81.25(16)  | O(4j)–Li(1)–O(5k) | 108.9(5) |
| O(4)–Te(2)–O(3)  | 83.79(16)  | O(1)–Li(1)–Br(1l) | 123.9(5) |
| O(4)–Te(2)–O(5)  | 108.52(17) |                   |          |

Symmetry codes: a)  $1-x, 1-y, 1-z$ ; b)  $1/2-x, 1/2+y, 1/2-z$ ; c)  $-1/2+x, 1/2-y, -1/2+z$ ;  
d)  $1-x, -y, 1-z$ ; e)  $1/2-x, -1/2+y, 1/2-z$ ; f)  $+x, -1+y, +z$ ; g)  $1/2+x, 1/2-y, 1/2+z$ ; h)  
 $1/2+x, 3/2-y, 1/2+z$ ; i)  $1/2-x, -1/2+y, 3/2-z$ ; j)  $+x, 1+y, +z$ ; k)  $-1/2+x, 3/2-y, -1/2+z$ ;  
l)  $1/2-x, 1/2+y, 3/2-z$ .

**Table S2.** Energy-Dispersive Spectrometry (EDS) data for BaLiTe<sub>2</sub>O<sub>5</sub>Cl and BaLiTe<sub>2</sub>O<sub>5</sub>Br.

**BaLiTe<sub>2</sub>O<sub>5</sub>Cl**

| Point 1 |        |        |         | Point 2                                                                  |        |        |        |
|---------|--------|--------|---------|--------------------------------------------------------------------------|--------|--------|--------|
| Element | Weight | Atomic | Formula | Element                                                                  | Weight | Atomic | Formul |
| Ba L    | 27.81  | 11.72  | 1.0     | Ba L                                                                     | 28.05  | 11.85  | 1.01   |
| Te L    | 50.09  | 22.73  | 1.94    | Te L                                                                     | 50.39  | 22.80  | 1.94   |
| Cl K    | 7.26   | 11.85  | 1.01    | Cl K                                                                     | 6.96   | 11.78  | 1.0    |
| O K     | 14.84  | 53.70  |         | O K                                                                      | 14.6   | 53.57  |        |
| Totals  | 100    |        |         | Totals                                                                   | 100    |        |        |
| Point 3 |        |        |         | Average ratio:<br>Ba <sub>1.0</sub> Te <sub>1.94</sub> Cl <sub>1.0</sub> |        |        |        |
| Element | Weight | Atomic | Formula |                                                                          |        |        |        |
| Ba L    | 27.84  | 11.74  | 1.0     |                                                                          |        |        |        |
| Te L    | 50.19  | 22.76  | 1.94    |                                                                          |        |        |        |
| Cl K    | 7.16   | 11.82  | 1.01    |                                                                          |        |        |        |
| O K     | 14.81  | 53.68  |         |                                                                          |        |        |        |
| Totals  | 100    |        |         |                                                                          |        |        |        |

**BaLiTe<sub>2</sub>O<sub>5</sub>Br**

| Point 1 |        |        |         | Point 2                                                             |        |        |         |
|---------|--------|--------|---------|---------------------------------------------------------------------|--------|--------|---------|
| Element | Weight | Atomic | Formula | Element                                                             | Weight | Atomic | Formula |
| Ba L    | 23.98  | 10.33  | 1.0     | Ba L                                                                | 25.13  | 11.05  | 1.01    |
| Te L    | 45.83  | 21.26  | 2.06    | Te L                                                                | 45.48  | 21.53  | 1.98    |
| Br L    | 14.63  | 10.83  | 1.05    | Br L                                                                | 28.05  | 10.90  | 1.0     |
| O K     | 15.56  | 57.57  |         | O K                                                                 | 14.97  | 56.52  |         |
| Totals  | 100    |        |         | Totals                                                              | 100    |        |         |
| Point 3 |        |        |         | Average ratio:<br>$\text{Ba}_{1.0}\text{Te}_{1.99}\text{Br}_{1.02}$ |        |        |         |
| Element | Weight | Atomic | Formula |                                                                     |        |        |         |
| Ba L    | 25.31  | 11.40  | 1.0     |                                                                     |        |        |         |
| Te L    | 45.49  | 22.07  | 1.94    |                                                                     |        |        |         |
| Br L    | 15.00  | 11.62  | 1.02    |                                                                     |        |        |         |
| O K     | 14.20  | 54.91  |         |                                                                     |        |        |         |
| Totals  | 100    |        |         |                                                                     |        |        |         |

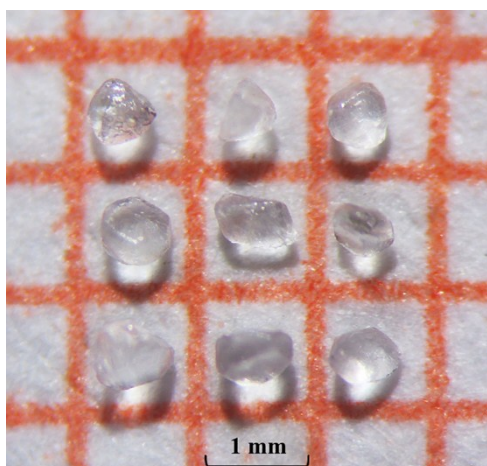

BaLiTe<sub>2</sub>O<sub>5</sub>Cl

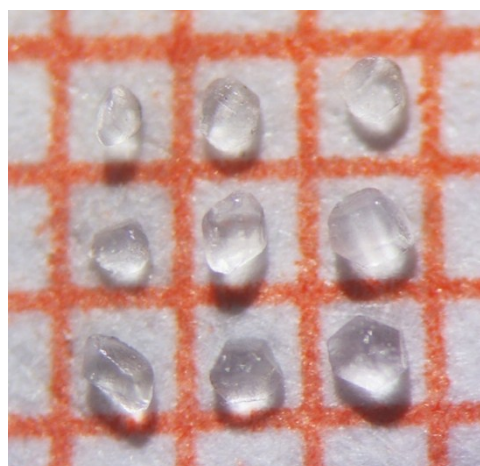

BaLiTe<sub>2</sub>O<sub>5</sub>Br

**Fig. S1.** The images for BaLiTe<sub>2</sub>O<sub>5</sub>Cl and BaLiTe<sub>2</sub>O<sub>5</sub>Br.

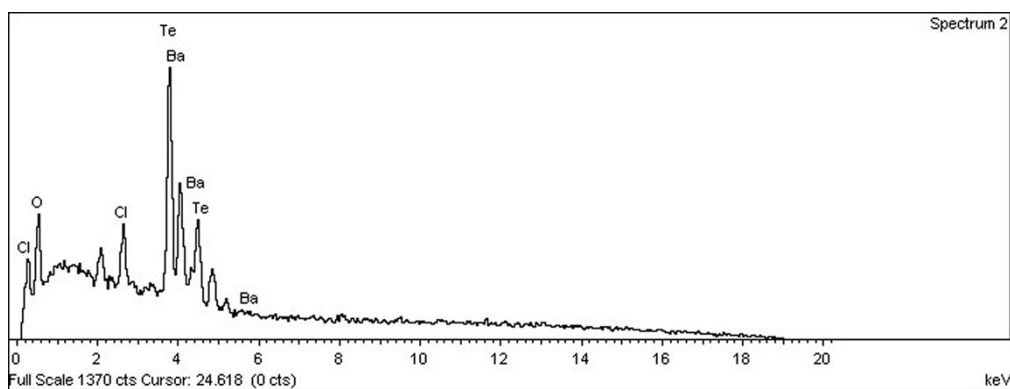

BaLiTe<sub>2</sub>O<sub>5</sub>Cl

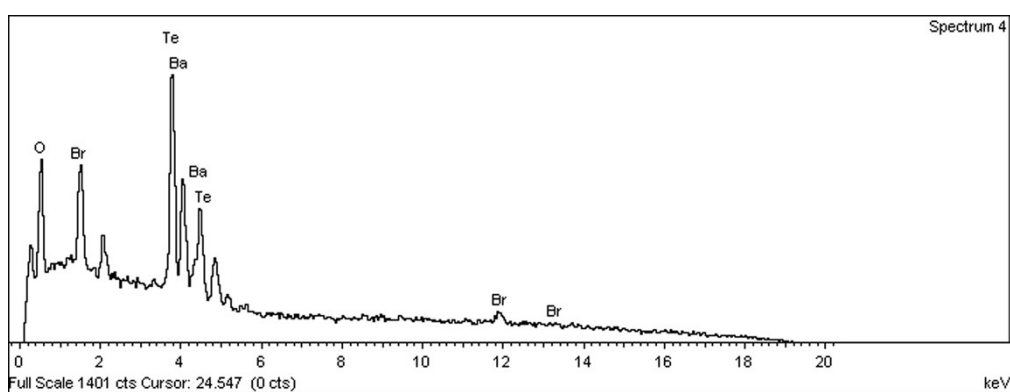

BaLiTe<sub>2</sub>O<sub>5</sub>Br

**Fig. S2.** Energy-Dispersive Spectrometry (EDS) plot of BaLiTe<sub>2</sub>O<sub>5</sub>Cl and BaLiTe<sub>2</sub>O<sub>5</sub>Br.



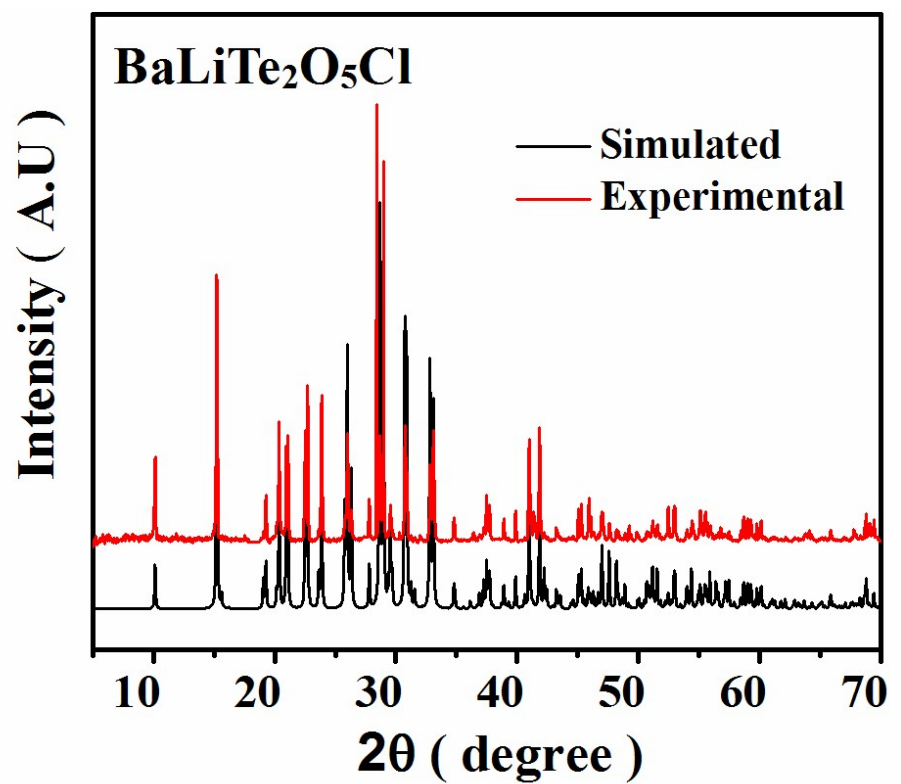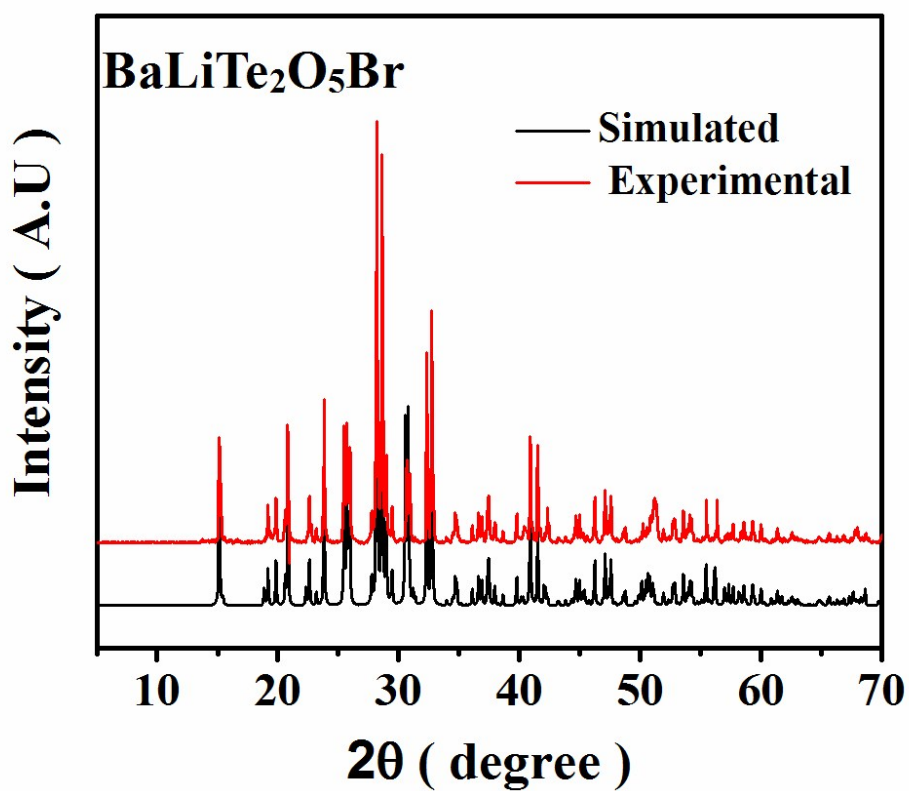

**Fig. S3.** Experimental and simulated PXRD patterns of BaLiTe<sub>2</sub>O<sub>5</sub>Cl and BaLiTe<sub>2</sub>O<sub>5</sub>Br.

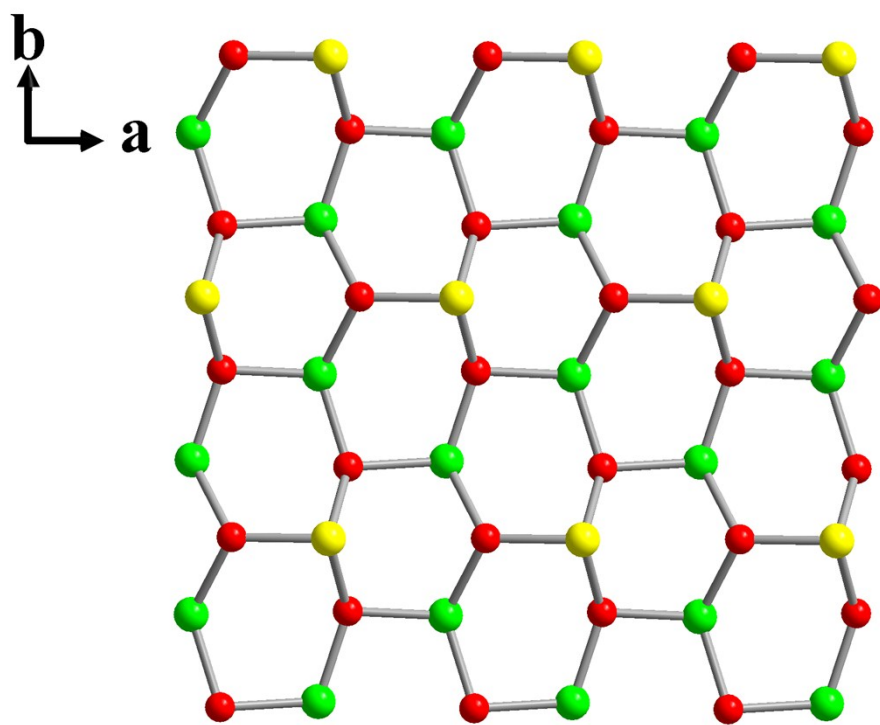

(a) Monolayer in  $\text{Li}_2\text{TeO}_3$

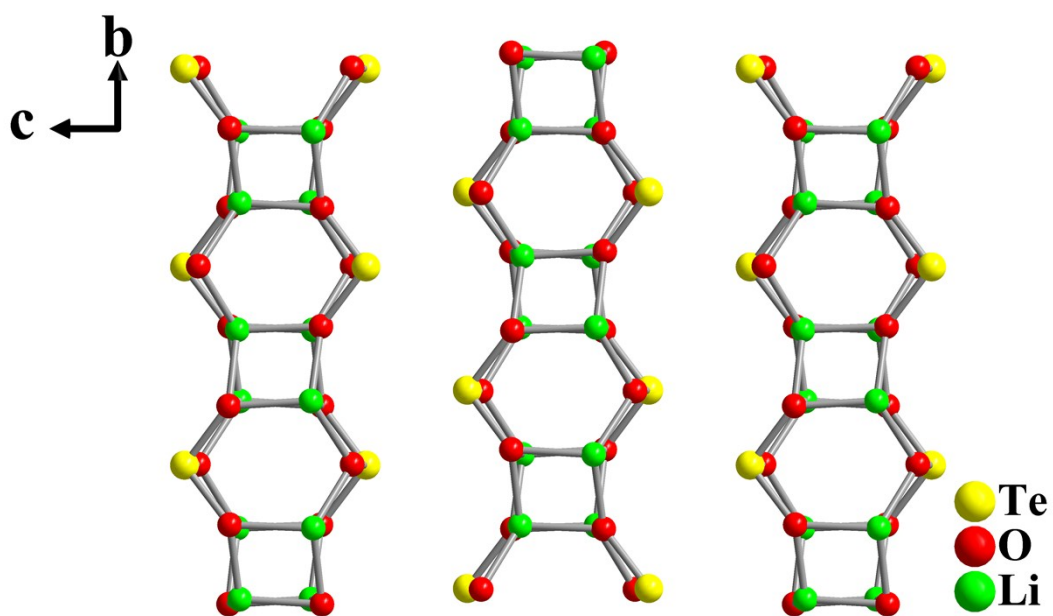

(b) 2D double layer in  $\text{Li}_2\text{TeO}_3$

**Fig. S4.** Structure of  $\text{Li}_2\text{TeO}_3$ .

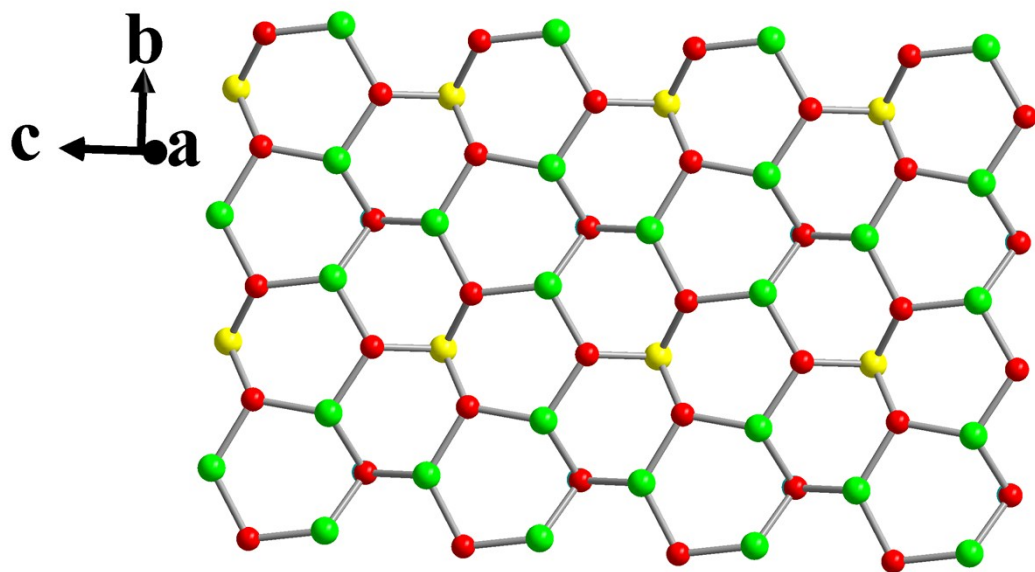

(a) Monolayer in  $\text{Li}_3(\text{TeO}_3)(\text{OH})$

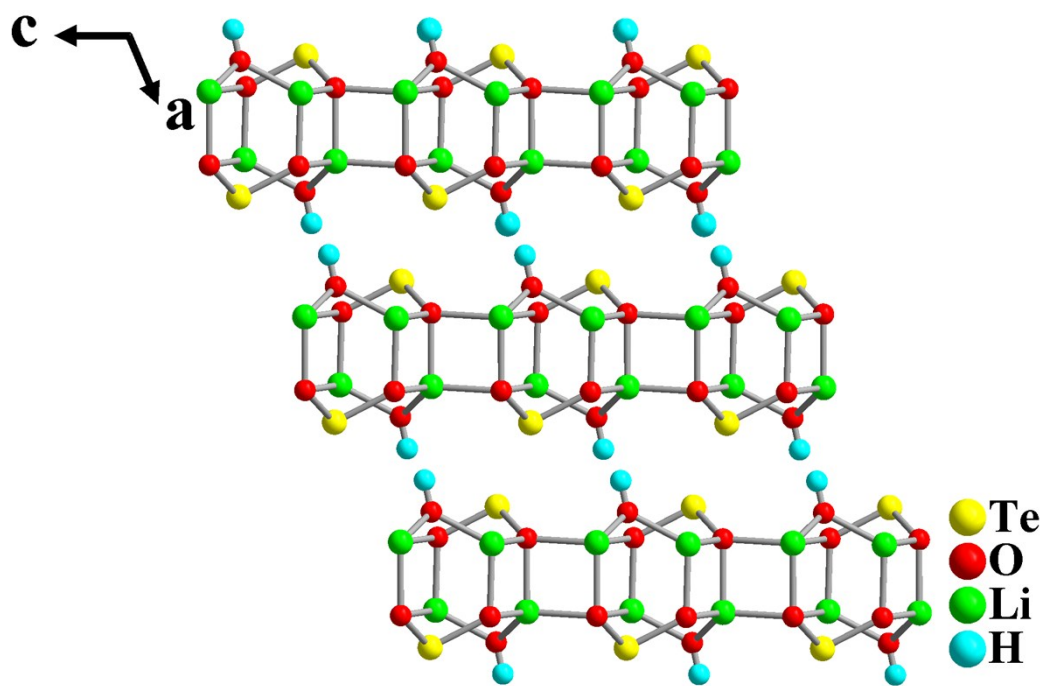

(b) 2D double layer in  $\text{Li}_3(\text{TeO}_3)(\text{OH})$

**Fig. S5.** Structure of  $\text{Li}_3(\text{TeO}_3)(\text{OH})$ .

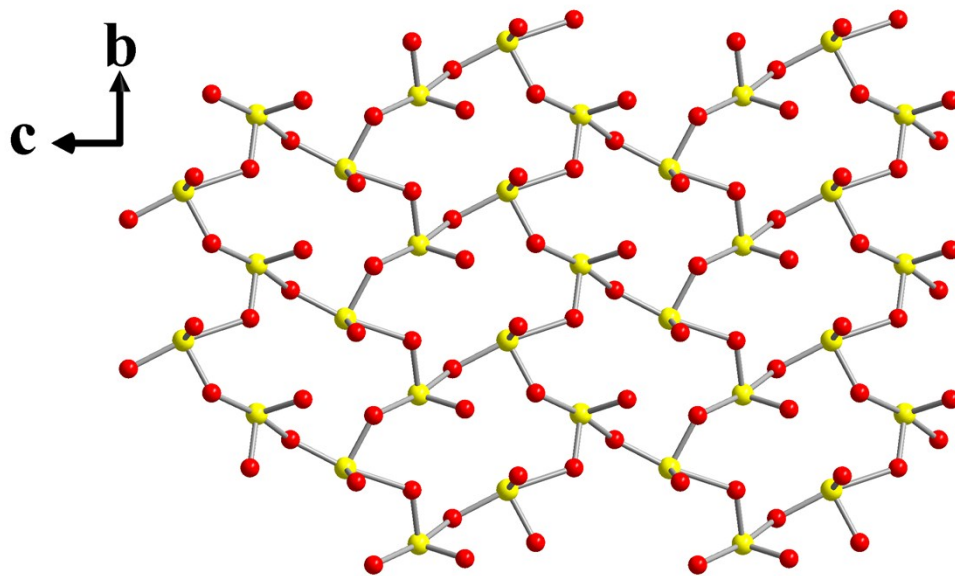

(a) Te-O layer in  $\text{Li}_2\text{Te}_2\text{O}_5$

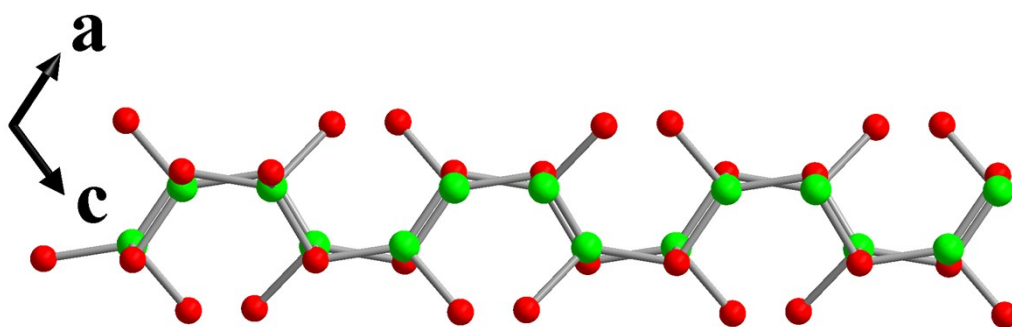

(b) Li-O layer in  $\text{Li}_2\text{Te}_2\text{O}_5$

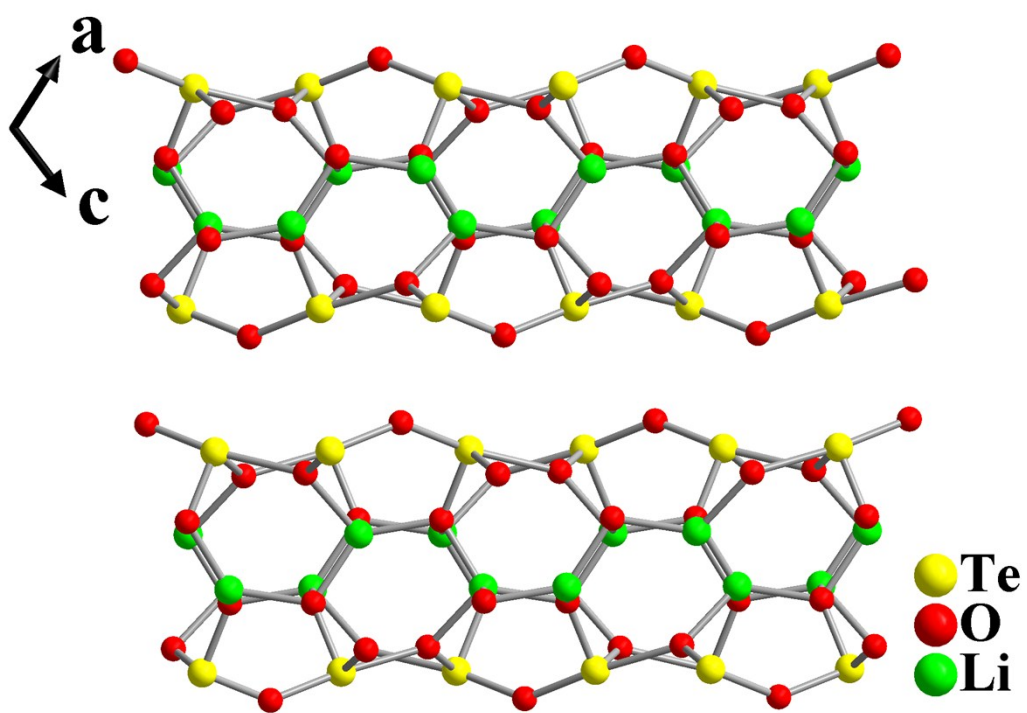

(c) 2D double layer in  $\text{Li}_2\text{Te}_2\text{O}_5$

Fig. S6. Structure of  $\text{Li}_2\text{Te}_2\text{O}_5$ .

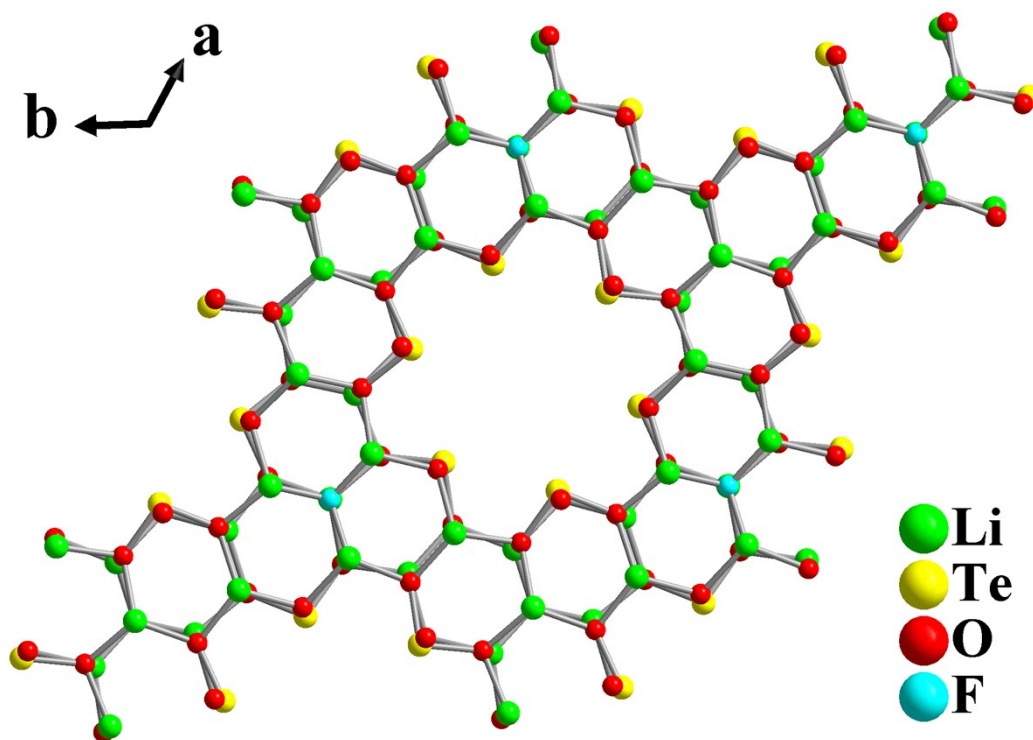

Fig. S7. 3D Structure of  $\text{Li}_7(\text{TeO}_3)_3\text{F}$ .

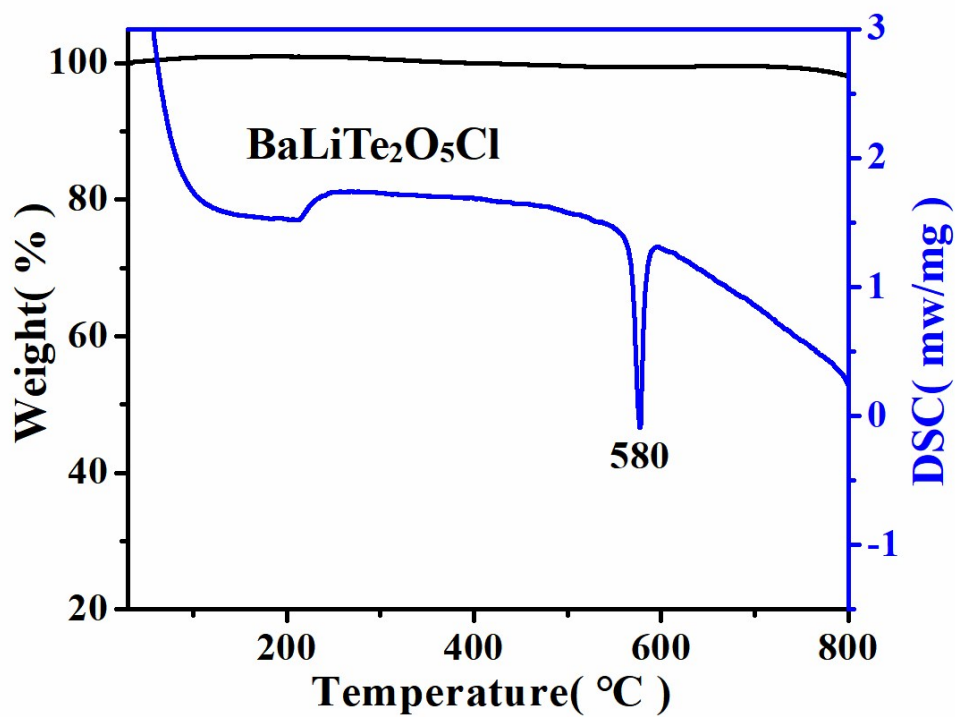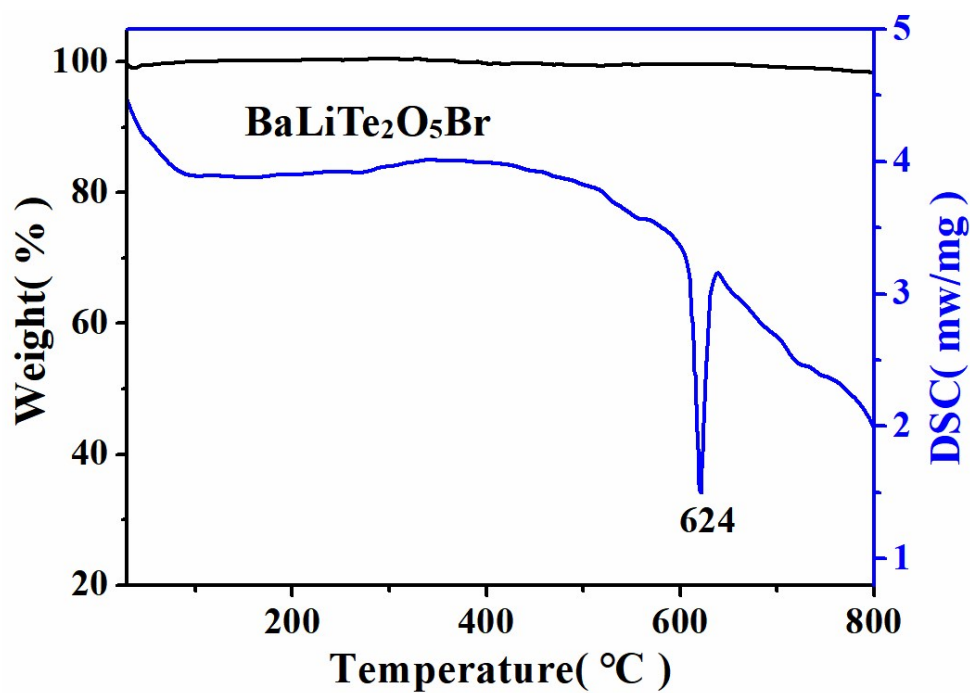

Fig. S8. TGA and DSC curves of BaLiTe<sub>2</sub>O<sub>5</sub>Cl and BaLiTe<sub>2</sub>O<sub>5</sub>Br.

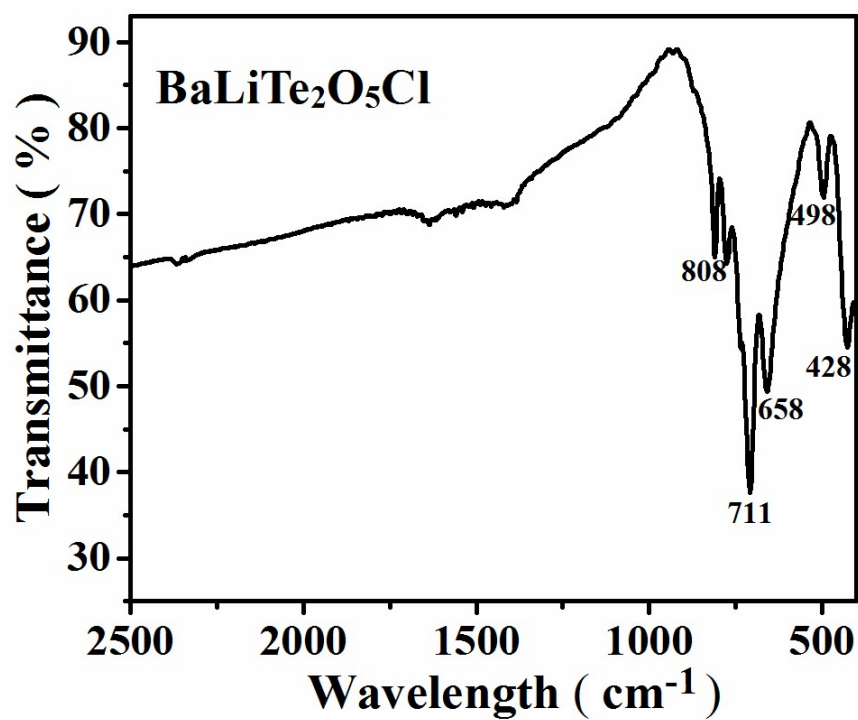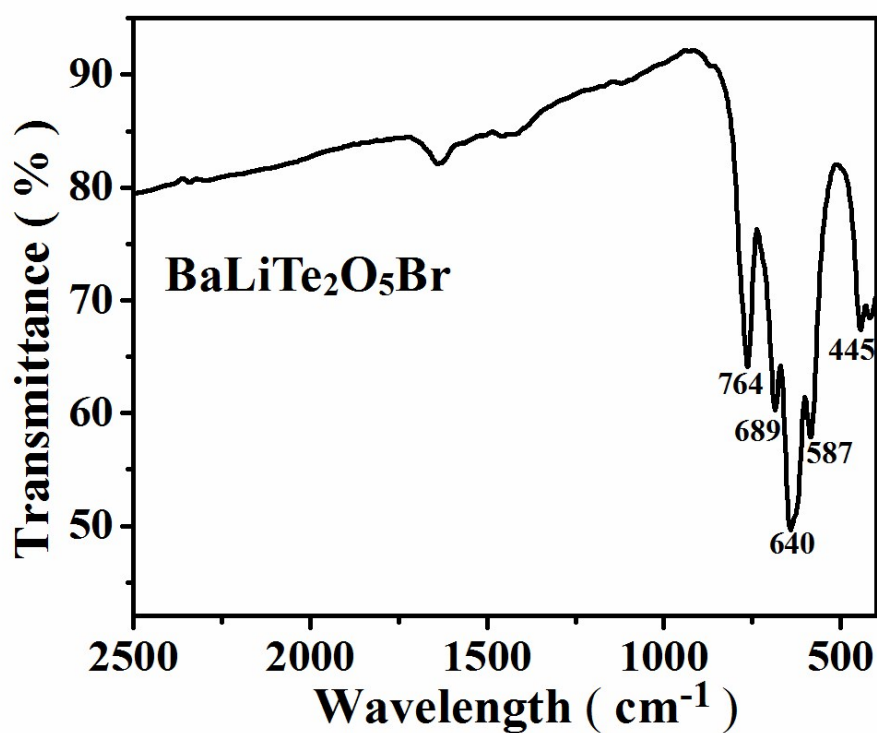

Fig. S9. IR spectra of BaLiTe<sub>2</sub>O<sub>5</sub>Cl and BaLiTe<sub>2</sub>O<sub>5</sub>Br.
